# Supplementary material for: Ar plasma assists in enhanced oxygen evolution kinetics of MOG-derived multicomponent transition metal sulfides
Source: Royal Society of Chemistry journal article supplement (doi:10.1039/d3dt00823a), 2023-01-01
Supplement: d3dt00823a1.pdf [file d3dt00823a1.pdf]

## Electronic Supplementary Information

### Ar plasma assisted enhanced oxygen evolution kinetics of MOG- derived multicomponent transition metal sulfides

Jia-Yang Luo,<sup>a,b</sup> Ya-Meng Yin,<sup>\*a,b</sup> Gui-Zhi Guo,<sup>a</sup> Xi-Wen Chang,<sup>a</sup> Xue-Qian Wu,<sup>a,b</sup> Ya-Pan  
Wu,<sup>a,b</sup> Shuang Li,<sup>a,b</sup> Ru-An Chi,<sup>b</sup> and Dong-Sheng Li<sup>\*a,b</sup>

<sup>a</sup>College of Materials and Chemical Engineering, Key Laboratory of Inorganic Nonmetallic  
Crystalline and Energy Conversion Materials, China Three Gorges University, Yichang,  
Hubei 443002, P.R. China.

<sup>b</sup>Hubei Three Gorges Laboratory, Yichang, Hubei 443007, P. R. China

**\*Corresponding Author:** Ya-Meng Yin, Email: [yameng.yin@ctgu.edu.cn](mailto:yameng.yin@ctgu.edu.cn)

Dong-Sheng Li, Email: [lidongsheng1@126.com](mailto:lidongsheng1@126.com)

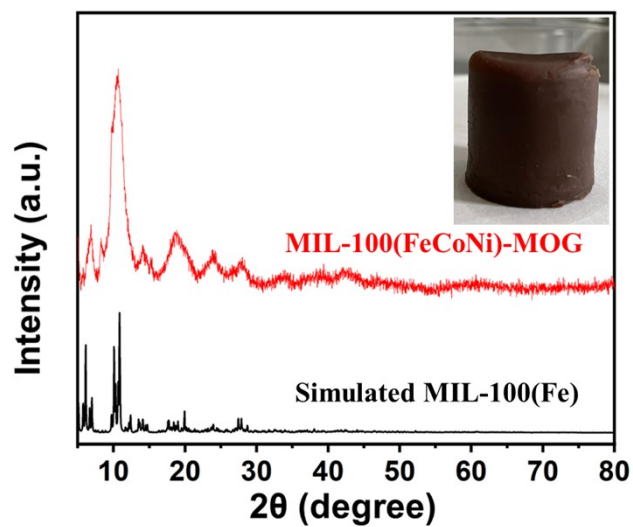

**Fig. S1** XRD patterns for synthesized MIL-100(FeCoNi)-MOG and simulated MIL-100(Fe), the inset is a digital image of MIL-100(FeCoNi)-MOG product.

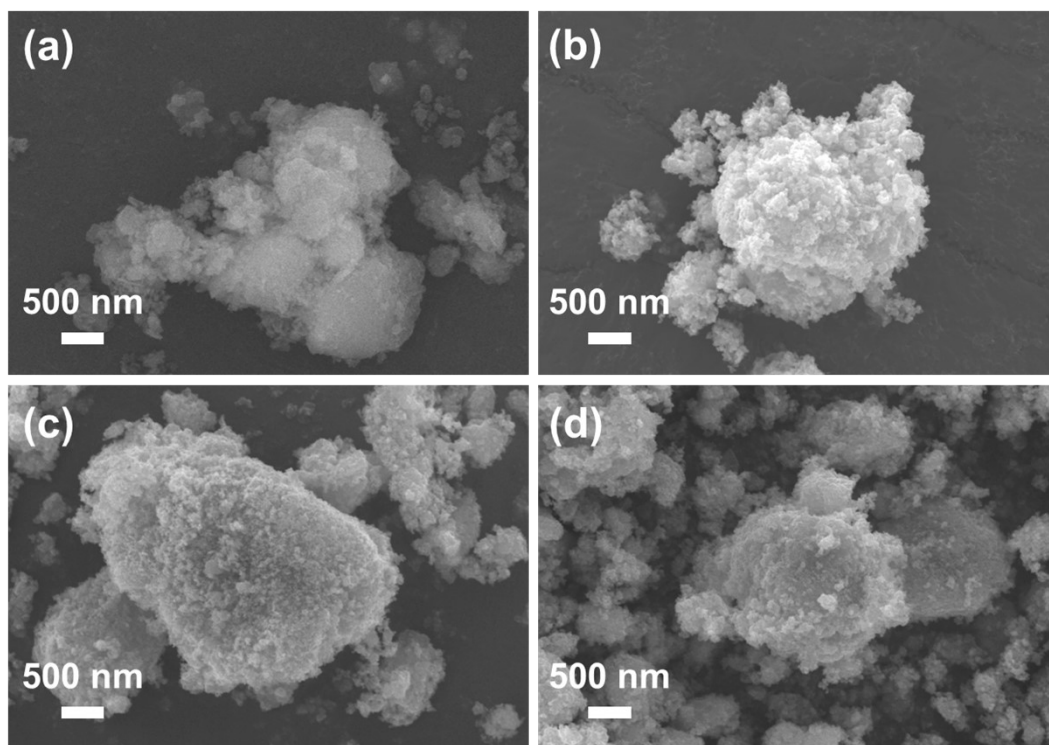

**Fig. S2** SEM images of (a) FeCoNi-MOG, (b) Pristine, (c) Ar-300W and (d) Ar-500W.

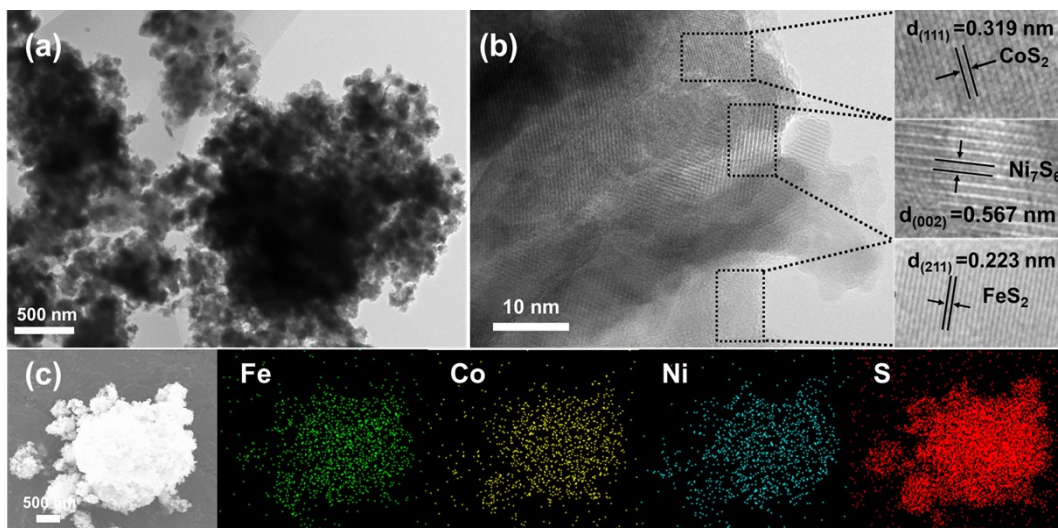

**Fig. S3** (a) TEM, (b) HRTEM and (c) EDS elemental mapping images of Pristine.

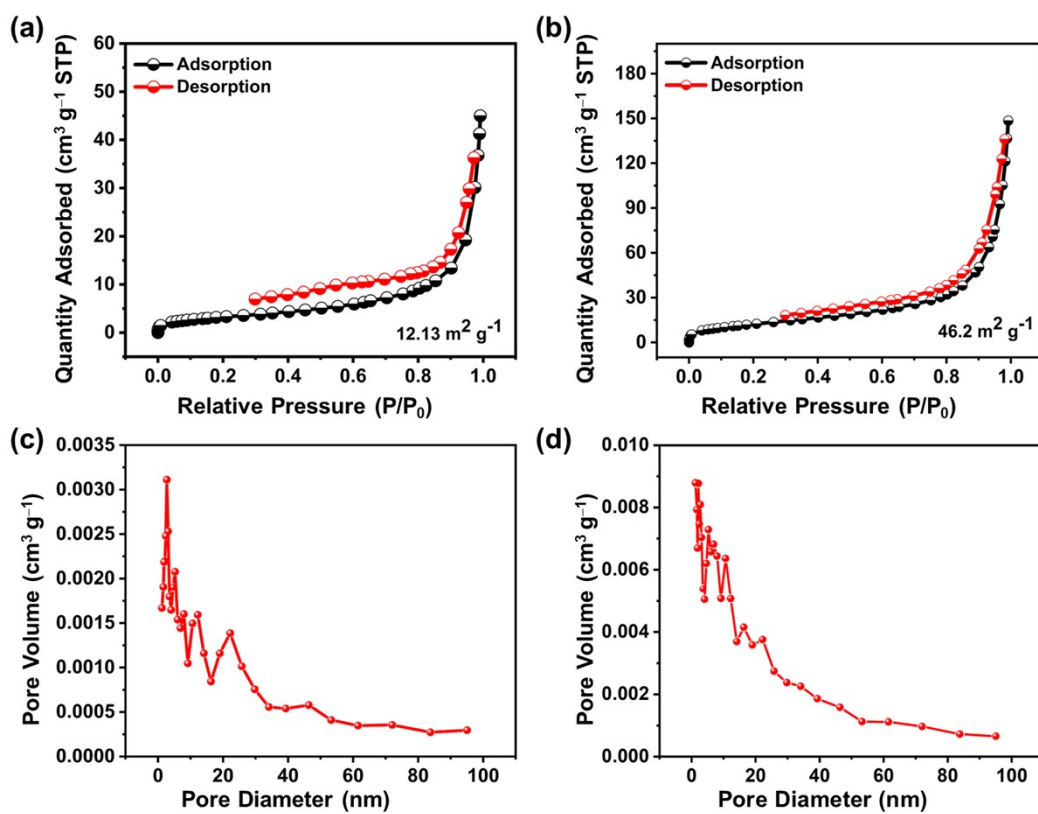

**Fig. S4** N<sub>2</sub> adsorption-desorption curves and pore size distribution of (a, c) Pristine and (b, d) Ar-400 W.

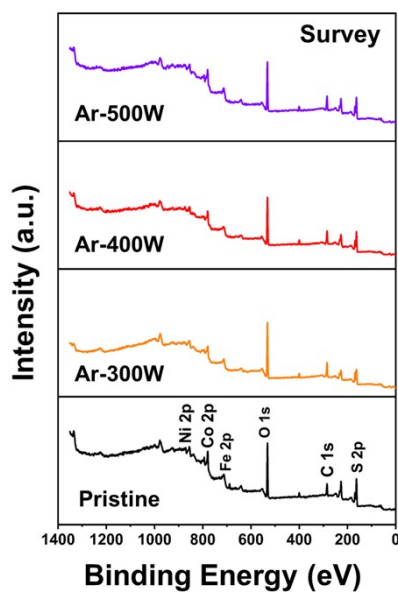

**Fig. S5** XPS survey spectrum of the obtained FeCoNiS<sub>x</sub> catalysts.

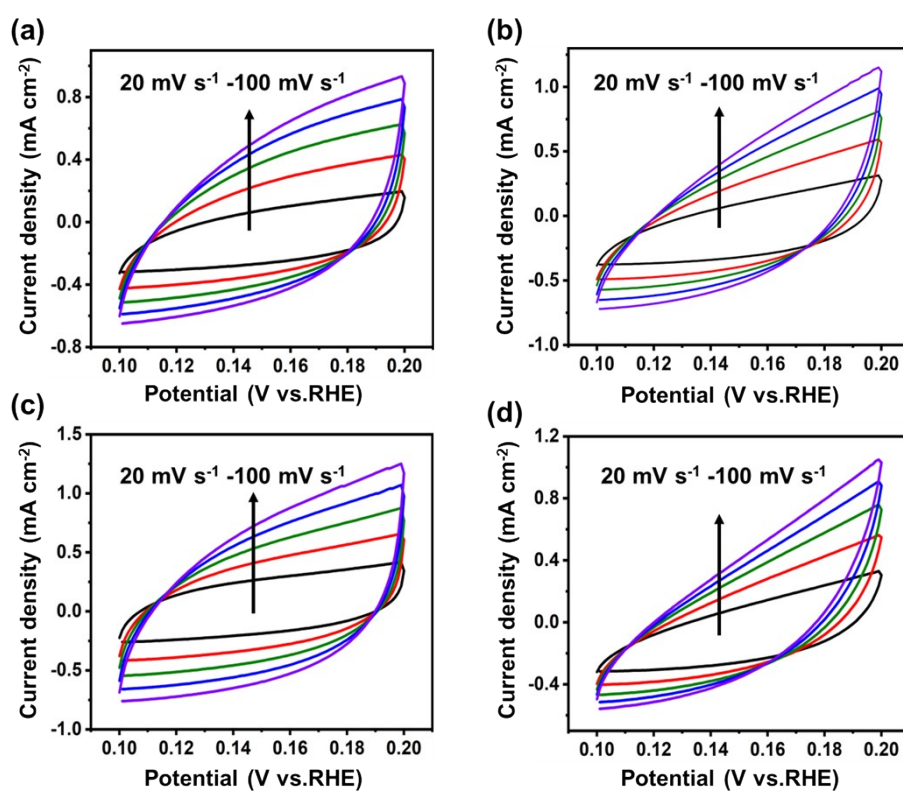

**Fig. S6** CV curves of (a) Pristine, (b) Ar-300W, (c) Ar-400W and (d) Ar-500W with different scan rates from 20 to 100 mV·s<sup>-1</sup>.

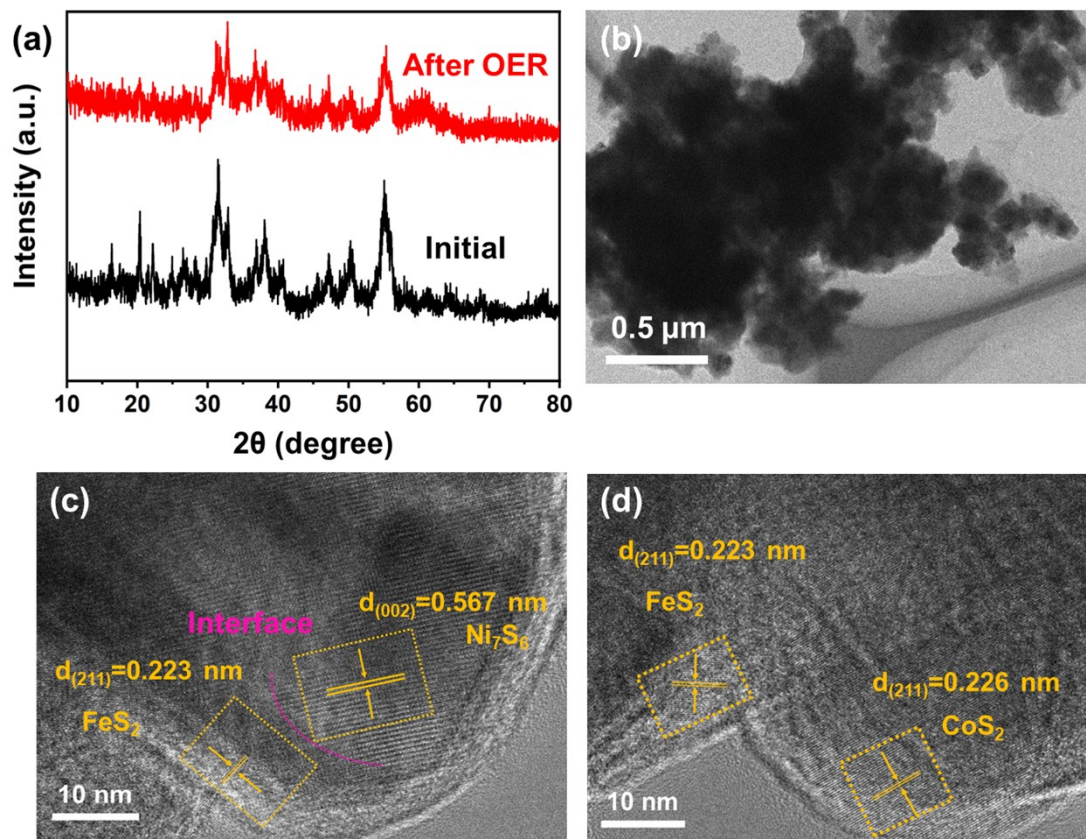

**Fig. S7** (a) XRD patterns, (b) TEM image and (c, d) HRTEM images of Ar-400W after OER process.

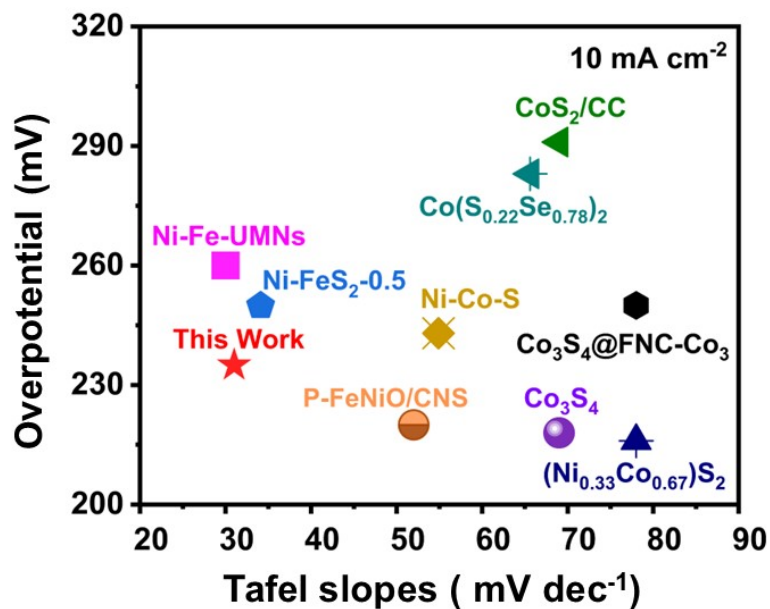

**Fig. S8** This work compares Tafel slopes and overpotentials at 10 mA cm<sup>-2</sup> to other reported transition metal-based OER catalysts in basic media.

**Table S1.** Comparison of the OER performance between Ar-400 W with recently reported transition metal-based electrocatalysts.

| Catalysts                                              | Electrolyte      | Overpotential (mV) | Tafel slope (mV dec <sup>-1</sup> ) | References       |
|--------------------------------------------------------|------------------|--------------------|-------------------------------------|------------------|
| Ni-Co-S                                                | 1.0 M KOH        | 243                | 54.9                                | S1               |
| (Ni <sub>0.33</sub> Co <sub>0.67</sub> )S <sub>2</sub> | 1.0 M KOH        | 216                | 78                                  | S2               |
| Co <sub>3</sub> S <sub>4</sub> @FNC-Co <sub>3</sub>    | 1.0 M KOH        | 250                | 78                                  | S3               |
| Co(S <sub>0.22</sub> Se <sub>0.78</sub> ) <sub>2</sub> | 1.0 M KOH        | 283                | 65.6                                | S4               |
| CoS <sub>2</sub> /CC                                   | 1.0 M KOH        | 291                | 69                                  | S5               |
| Co <sub>3</sub> S <sub>4</sub>                         | 1.0 M KOH        | 218                | 69                                  | S6               |
| Ni-FeS <sub>2</sub> -0.5                               | 1.0 M KOH        | 250                | 34                                  | S7               |
| Ni-Fe-UMNs                                             | 1.0 M KOH        | 260                | 30                                  | S8               |
| P-FeNiO/CNS                                            | 1.0 M KOH        | 220                | 52                                  | S9               |
| <b>FeCoNiS<sub>x</sub> (Ar-400W)</b>                   | <b>1.0 M KOH</b> | <b>235</b>         | <b>31</b>                           | <b>This Work</b> |

## References

- S1 Z. Liu, B. Tang, X. Gu, H. Liu and L. Feng, Selective structure transformation for NiFe/NiFe<sub>2</sub>O<sub>4</sub> embedded porous nitrogen-doped carbon nanosphere with improved oxygen evolution reaction activity, *Chem. Eng. J.*, 2020, **395**, 125170.
- S2 Y. H. Deng, C. Ye, B. X. Tao, G. Chen, Q. Zhang, H. Q. Luo and N. B. Li, One-step chemical transformation synthesis of CoS<sub>2</sub> nanosheets on carbon cloth as a 3D flexible electrode for water oxidation, *J. Power Sources*, 2018, **397**, 44-51.
- S3 Z. Kang, H. Guo, J. Wu, X. Sun, Z. Zhang, Q. Liao, S. Zhang, H. Si, P. Wu, L. Wang and Y. Zhang, Engineering an earth-abundant element-based bifunctional electrocatalyst for highly efficient and durable overall water splitting, *Adv. Funct. Mater.*, 2019, **29**, 1807031.
- S4 Q. Zhang, C. Ye, X. L. Li, Y. H. Deng, B. X. Tao, W. Xiao, L. J. Li, N. B. Li and H. Q. Luo, Self-interconnected porous networks of NiCo disulfide as efficient bifunctional electrocatalysts for overall water splitting, *ACS Appl. Mater. Interfaces*, 2018, **10**, 27723-27733.
- S5 X. Zhu, J. Dai, L. Li, D. Zhao, Z. Wu, Z. Tang, L.-J. Ma and S. Chen, Hierarchical carbon microflowers supported defect-rich Co<sub>3</sub>S<sub>4</sub> nanoparticles: An efficient electrocatalyst for water splitting, *Carbon*, 2020, **160**, 133-144.

- S6 L. Fang, W. Li, Y. Guan, Y. Feng, H. Zhang, S. Wang and Y. Wang, Tuning unique peapod-like  $\text{Co}(\text{S}_x\text{Se}_{1-x})_2$  nanoparticles for efficient overall water splitting, *Adv. Funct. Mater.*, 2017, **27**, 1701008.
- S7 S. Tang, X. Wang, Y. Zhang, M. Courté, H. J. Fan and D. Fichou, Combining  $\text{Co}_3\text{S}_4$  and  $\text{Ni}:\text{Co}_3\text{S}_4$  nanowires as efficient catalysts for overall water splitting: an experimental and theoretical study, *Nanoscale*, 2019, **11**, 2202-2210.
- S8 Z. Tan, L. Sharma, R. Kakkar, T. Meng, Y. Jiang and M. Cao, Arousing the reactive Fe sites in pyrite ( $\text{FeS}_2$ ) via integration of electronic structure reconfiguration and in situ electrochemical topotactic transformation for highly efficient oxygen evolution reaction, *Inorg. Chem.*, 2019, **58**, 7615-7627.
- S9 G. Hai, X. Jia, K. Zhang, X. Liu, Z. Wu and G. Wang, High-performance oxygen evolution catalyst using two-dimensional ultrathin metal-organic frameworks nanosheets, *Nano Energy*, 2018, **44**, 345-352.
